1           Open-source 3D printed air-jet for generating monodispersed alginate microhydrogels

2

3

4

5   Dustin J. Hadley<sup>1</sup>, Marina H. Gabrieli<sup>1</sup>, Kevin T. Campbell<sup>1</sup>, and Eduardo A. Silva<sup>1\*</sup>

6

7

8

9   <sup>1</sup>Department of Biomedical Engineering, University of California Davis, Davis, California, United

10 States of America

11

12

13

14   \* Corresponding author:

15   Eduardo A. Silva

16   Department of Biomedical Engineering

17   1 Shields Ave. 15 Davis, CA, USA 95616

18   Email: [esilva@ucdavis.edu](mailto:esilva@ucdavis.edu)

19

20

21

22

23

## 24 **Abstract**

25

26           Open-source designs represent an attractive and new tool for research as it provides both  
27 affordable and accessible options to the lab environment. In particular, with the advent of new  
28 and cheap additive manufacturing technologies, the open-source design of lab hardware enables  
29 others to perform research that would be difficult otherwise. This manuscript describes an air-  
30 jet system designed to be open-source and simple to produce with 3D printing. The fully 3D  
31 printed air-jet was designed for the generation of hydrogel microbeads of a controllable size.  
32 Alginate microbeads were used as a working model, given that it has many promising research  
33 applications due to their injectability and highly reproducible properties. A fit definitive design  
34 of experiments was performed to determine critical factors affecting diameter, index of  
35 dispersity, and circularity of microbeads from this air-jet design. By regulating alginate  
36 concentration, air pressure, pump speed, and needle diameter could achieve control over  
37 microbeads size from 200-800  $\mu\text{m}$  with low variance. Furthermore, we also demonstrate the  
38 potential probiotic research applications of the open-source air-jet through the encapsulation of  
39 bacteria in alginate microbeads with controllable degradation. The results of this study exhibit  
40 an open-source platform for making microscale biomaterials with controllable properties that  
41 can be achieved through budget 3D printers.

42

43

44 **Keywords:** hydrogels; biomaterial; encapsulation; 3D printing; laboratory hardware

## 45 **Introduction**

46 Publishing replicable scientific work remains recognized as a critical endeavor that  
47 researchers, funding agencies, and publishers should engage in cooperatively. Several efforts  
48 have been made to encourage reproducible science [4-6], including free open-source hardware  
49 (FOSH) and a growing number of online repositories, such as Github, Figshare, and Protocols.io  
50 [7, 8]. Specifically, FOSH cultivates participation in science by reducing supply limitations,  
51 fostering new research opportunities, and facilitating translation of these tools for educational  
52 purposes [8]. For example, open-source tools are currently available on the National Institutes  
53 of Health (NIH) website for use in cell cultures, microfluidics, and drug delivery systems [9].  
54 Furthermore, the open-source license benefits researchers because building equipment yields a  
55 deeper understanding and allows modifications of designs [10]. The knowledge collected by  
56 users refines the open-source device to become robust while remaining accessible to others. One  
57 appealing strategy for creating FOSH is through designs that utilize 3D printing. The  
58 accessibility of fabrication with 3D printing has furthered the inventiveness within different  
59 communities, from laymen to aerospace engineers [10-15]. Moreover, the reduced cost of 3D  
60 printers in the past couple of years is resulting in 3D printers becoming available to the public at  
61 Makerspaces, public libraries, and universities [16].

62 One potential tool that would benefit from becoming a FOSH is an air-based system to  
63 produce microbeads. These microbead generators commonly employ polymer and crosslinker  
64 solutions in the formation of microscale hydrogel [17-20]. Microbeads are currently utilized and  
65 studied in different functions, including drug and cell delivery, cryopreservation, and scaffolds  
66 for tissue engineering strategies [20-22]. In these biomedical science applications, alginate is a  
67 particularly attractive polymer for microbeads, as it is biocompatible, undergoes rapid gelation  
68 under gentle conditions, and enables controllable mesh size [23]. Alginate, a copolymer  
69 comprised of (1,4)-linked  $\beta$ -D-mannuronate (M) and  $\alpha$ -L-guluronate (G) residues, crosslinks in

70 the presence of divalent cations, such as  $\text{Ca}^{2+}$ , resulting in the formation of a 3D polymeric  
71 network characteristic of hydrogels [24-26]. Specifically, alginate microhydrogels have been  
72 applied to guiding the morphogenesis of progenitor endothelial cells and control the delivery of  
73 lentivectors and stem cells [27-29]. Alginate microbeads are commonly generated using droplet  
74 microfluidics, coaxial airflow units, two-channel air-jackets, and high voltage [22, 27, 28, 30].

75 To generate alginate microbeads, we designed a novel 3D printed air-jet system that  
76 generates control droplets of solution. An air-jet pushes air away from a source, making it  
77 similar to air bifurcation or electrostatic bead generators [22, 30, 31]. Our air-jet uniformly  
78 extrudes air across a needle attached to a syringe. A syringe pump supplied an alginate polymer  
79 solution at the needle tip, which formed droplets that fall into a calcium bath and generate  
80 hydrogel beads. Our objective for the device design was to permit modularity and sterility while  
81 having a low manufacturing cost by being compatible with budget 3D printers. We hypothesized  
82 controlling airflow, pump speed, and needle size for the 3D printed air-jet can create well-  
83 defined alginate microbeads. The device was characterized via a design of experiments (DOE)  
84 analysis using a fit definitive screening to define factors that altered resulting alginate bead  
85 characteristics. We expect this system to be reproducible between experiments and between  
86 laboratories due to well-defined set-up parameters that are typically less abundant in other  
87 publications using air-based droplet generating methods [31-33].

88

## 89 **Materials and Methods**

### 90 **Device design and manufacturing**

91 The air-jet was designed using Fusion 360® software (Autodesk, Inc) and prepared for  
92 3D printing using Cura software (Ultimaker), an open-source slicer program. The device was  
93 split into three components, including the air-jet, the air intake, and supports. The air intake

94 was printed with the air inlet parallel to the plane of the printing bed to prevent the nozzle from  
95 fracturing into the air tubing along with the printed layers. The air-jet was oriented with the  
96 outlet normal to the plane of the printing bed, such that the outlet for droplets was printed last,  
97 to prevent the need for support material. All components were printed on an MP Select Mini V2  
98 (Monoprice, Inc) with poly (lactic acid) (Hatchbox®) at a layer thickness of 0.0875 mm and a  
99 printing speed of 50 mm/s. The extrusion temperature was 190 °C, and the heat bed  
100 temperature was 60 °C.

101

## 102 **Generation of alginate microbeads**

103 LF 10/60 alginate polymer (~120-150 kDa) with higher G-block content (>60% as  
104 specified by the manufacturer) obtained from Novamatrix (FMC) was used to generate the  
105 microbeads. Alginate solutions were prepared by dissolving alginate polymer in either deionized  
106 water (diH<sub>2</sub>O) or phosphate buffer solution with added magnesium and calcium (PBS<sup>++</sup>; Life  
107 Technologies), as previously described [34]. The open-source air-jet and a syringe pump  
108 (Braintree Scientific) were run in parallel in a vertical position above a calcium bath. Syringes  
109 (Becton Dickinson) with varying needle sizes (PrecisionGlide™; Becton Dickinson) were  
110 positioned within the syringe pump and air-jet. The distance from the needle to the calcium bath  
111 was constant at 15 cm. The air-jet was then centered over the needle to generate a uniform air  
112 flow across the needle, with the tip of the needle slightly protruding from the outlet of air-jet.  
113 Nitrogen gas was then run through the air-jet before starting the syringe pump to prevent  
114 alginate from getting stuck in the air-jet chamber. After activating the syringe pump, the  
115 direction of droplets was checked using a flat surface. Adjustments were made in response to  
116 poor alignment of the needle through the center of the air-jet to ensure alginate droplets fell  
117 directly downwards. Finally, 5 mL of 100 mM calcium chloride (CaCl<sub>2</sub>) (Sigma) was used as the  
118 calcium bath for all experiments and placed underneath the air-jet. Alginate microbeads were

119 generated for one minute with this setup before being analyzed directly from the wells using  
120 ImageJ software (NIH).

121

## 122 **Definitive Screen Design to characterize nitrogen** 123 **pressure, needle gauge, and pump speed effect on** 124 **microbead formation**

125 A DOE approach with a definitive screening design (DSD; JMP software) was utilized to  
126 determine the impact of several factors on the properties of microbead generated with this air-  
127 jet design. A fit definitive screening test was used to ascertain active main effects and second-  
128 order effects of buffer type, needle diameter, air pressure, alginate concentration, and pump  
129 speed on bead diameter, the index of dispersion of bead diameters, and circularity. The effect of  
130 polymer solution viscosity was investigated using alginate dissolved at different concentrations  
131 (1, 2, and 3% (w/v)) and in different solvents (PBS<sup>++</sup> and diH<sub>2</sub>O). The various needle gauges of  
132 27, 21, and 18 were tested, which had approximate diameters of 0.210, 0.524, and 0.840 mm,  
133 respectively. Nitrogen pressure was altered between 200 to 800 kPa using a pressure gauge  
134 attached to a compressed nitrogen gas tank. Syringe pump speeds were also varied between 100,  
135 250, and 400  $\mu\text{L}/\text{min}$ . Index of dispersion is the variance normalized to the mean and was used  
136 to analyze bead uniformity. The circularity is defined below in the following equation:

$$137 \text{ Bead Circularity} = 4 * \pi * \left( \frac{\text{Area}}{\text{Perimeter}^2} \right),$$

138 where the value of bead circularity varies between 0 to 1, with 1 being a perfect circle.

139 Microbeads were analyzed with ImageJ, and significance was determined via the fit definitive  
140 screening analysis. DSD utilized a minimum of 18 groups, where a group is a set of differing  
141 factors, with  $n = 8$  samples per group. The residual was calculated for each examined factor by  
142 subtracting the mean of all measured values of a specific factor from the average of a specific

143 condition of the factor. If conditions of a factor are determined to be significantly different,  
144 trends were described with predictive plots generated using least-square regression or  
145 polynomial least squares.

146

## 147 **Additional experiments on experimental design**

### 148 **parameters**

149 Additional experiments were performed to determine how the influence of air pressure  
150 and pump speed on microbead formation. Air pressures were used from 0 to 800 kPa in 100 kPa  
151 increments. For 0 kPa, the air-jet was removed to prevent alginate solution from getting stuck  
152 within the device. The pump speeds of 10, 50, 100, 150, and 200  $\mu\text{L}/\text{min}$  were used with a  
153 calcium bath. The viscosity and surface tension of the calcium bath was altered through the  
154 addition of surfactant, TWEEN® 20 (0.01% (v/v)), in pump speed experiments. Both  
155 experimental set-ups utilized a 27G needle with 2% (w/v) alginate, and 100 mM  $\text{CaCl}_2$  baths.  
156 Bead diameter, diameter index of dispersion, and circularity were determined using ImageJ  
157 (NIH).

158

### 159 **Bacteria in alginate microbeads and alginate lyase bead**

#### 160 **degradation**

161 Green fluorescent protein (GFP) expressing *Escherichia coli* (*E. coli*) were loaded into  
162 2% (w/v) alginate solution and dropping into 100 mM  $\text{CaCl}_2$  solution containing 0.25% (w/v)  
163 chitosan (Sigma). Chitosan was initially dissolved at 4% within 0.066 M glacial acetic acid  
164 (Sigma) before being diluted to the final concentration. Microbeads were made by transferring  
165 alginate solution through a 25G needle at 100  $\mu\text{L}/\text{min}$  with the air-jet fed by nitrogen gas at  
166 600kPa. *E. coli* loaded microbeads were cultures in Lysogeny broth (LB; VWR). For the

167 generation of degradable alginate microbeads, alginate polymer was incorporated with alginate  
168 lyase, an enzyme that cleaves glycosidic bonds in alginate polymers [35], at various  
169 concentrations (0, 5, and 50 mU/mL). A syringe with a 27G needle was filled with an alginate  
170 solution, containing alginate lyase, and microbeads were generated with the air-jet as described  
171 above. These alginate microbeads were left to gel for 15 minutes and subsequently washed in DI  
172 water. Next, approximately 100  $\mu$ L of beads were transferred to 12-well plates, topped in 4 mL of  
173 EGM-2MV media (Lonza), and incubated at 37 °C. At 1 hour and 1, 3, 5, 7, 14, and 21 days  
174 microbeads were imaged, and the size of the beads was analyzed with ImageJ. The initial  
175 distribution of microbead sizes at 1 hour, and the change in microbead size over 21 days was  
176 reported (n = 50).

## 177 **Statistical analysis**

178 Comparisons were assessed by Student's unpaired t-tests. Differences between  
179 conditions were considered significant if  $P < 0.05$ . All analyses were performed using GraphPad  
180 Prism software (GraphPad Software) and JMP software.

181



## 182 **Results**

### 183 **Design of a 3D printed air-jet**

184           The air-jet system was engineered for the rapid generation of alginate microbeads with  
185 consistent and controllable size. The design of the air-jet was optimized for a Fused Deposition  
186 Modeling (FDM) 3D printer, which enabled the internal features to be printed without support  
187 material. The distance between the inner cylinder that holds the needle and the outer wall was 1  
188 mm to prevent fusing between features while printing (Fig 1A). Additionally, air flows around  
189 this gap (teal), which has a cross-sectional area of approximately 33 mm<sup>2</sup>. This area expands to a  
190 maximum of 103.9 mm<sup>2</sup> before being constricted to an area of 7.1 mm<sup>2</sup> at the exit hole (green).  
191 The small needle channel (orange) has a cross-sectional area of approximately 1.77 mm<sup>2</sup>, which  
192 is further reduced with the inserted needle. This region reduces air from traversing up the  
193 needle inlet and increases air velocity at the tip of the needle. Including an angled inlet (red), the  
194 overall profile of the air-jet is compact to allow needles to fit through the air-jet (Fig 1B).  
195 Furthermore, the construction permits the incorporation of a needle and syringe, either through  
196 direct attachment to the syringe pump or separately through adjustable stands (Fig 1C-D).

197

198 **Fig 1. 3D Printed Air-jet design and set-up.** An engineering drawing of the internal  
199 dimensions displays an opening for airflow and the needle (A). A rendering of the model cross-  
200 section (left) and external view (right) (B). The 3D printed air-jet can be manipulated into  
201 different positions via the adjustable leg supports (C) or held in place by attaching directly to the  
202 syringe pump (D).

203

### 204 **Fit Definitive Screening Test**

205 A fit definitive screening test was performed to determine the main active effects of  
206 buffer type, needle diameter, air pressure, alginate concentration and pump speed on bead size,  
207 the variance of bead sizes, and circularity. Residuals for these factors were calculated and  
208 statistically assessed for first-order or second-order correlations. (Figure A-C in S1 Figure).  
209 From this definitive screening design, prediction trends were calculated for factors exhibiting a  
210 significant first-order or second-order relationship with microbead size, variance, or circularity.  
211 The equation for these predictive trends of continuous factors are presented in each subfigure  
212 (Fig 2A-C). Alginate concentration was determined to have a second-order effect on bead  
213 diameter, with higher alginate concentrations resulting in increased bead diameter (Fig 2A),  
214 decreased bead variance (Fig 2B), and increased circularity (Fig 2C). Similar trends were also  
215 observed with a decrease in air pressure. Needle diameter had a small effect on bead diameter,  
216 with a smaller needle diameter creating smaller beads. Additionally, the buffers used to dissolve  
217 the alginate polymer were found to influence the index of dispersity, with PBS<sup>++</sup> usually leading  
218 to a larger distribution of bead sizes. Representative images of the beads under similar  
219 conditions are shown. Beads with lower alginate concentrations were smaller and less uniformly  
220 round (Fig 2D). Using a faster pump speed, from 250 to 400  $\mu\text{L}/\text{min}$ , led to more uniformly  
221 round beads that appear slightly larger (Fig 2E). Beads formed with alginate dissolved in  $\text{diH}_2\text{O}$   
222 appear more uniformly round compared to alginate dissolved in a phosphate buffer (Fig 2F),  
223 while beads were smaller using a smaller needle size (Fig 2G).

224

225 **Fig 2. Prediction plots of factors affecting alginate microbead formation and**  
226 **representative images.** Prediction values combine groups with a specific factor condition  
227 regardless of differences in other factor conditions. Red lines represent linear or nonlinear fits,  
228 determined by the statistical significance of first-order or second-order effects. The outcomes of  
229 interest were bead diameter (A), index of dispersion of bead diameters (B), and circularity (C).

230 Comparable groups of microbeads generated from the design of experimental groups were  
231 displayed. A 27G (0.21 mm) needle with 200 kPa of air was used to dispense alginate at 1 and  
232 3% (w/v) at a rate of 400  $\mu\text{L}/\text{min}$  (D). Lastly, an 18G (0.838 mm) needle was used to dispense  
233 1% (w/v) alginate at 250 or 400  $\mu\text{L}/\text{min}$  using 200 kPa of air (E). Different buffers were tested  
234 with a 21G (0.534 mm) needle supplied with 2% (w/v) alginate at 250  $\mu\text{L}/\text{min}$  with 500 kPa of  
235 air flowing over the needle (F). Next, 18G (0.838 mm) and 27G (0.21 mm) needles were tested  
236 with 100  $\mu\text{L}/\text{min}$  of 3% (w/v) alginate with 200 kPa of airflow (G). In A-C, points represent the  
237 mean value, from  $n = 8$  samples, of individual runs of a design of experiments.

238

## 239 **Characterization of Microbeads from changes in Air**

### 240 **Pressure and Pump Speed**

241 Next, we further investigated air pressure and pump speed as possible factors for  
242 controlling bead sizes. A 27G (0.21mm) needle was used to make beads with 2% (w/v) alginate.  
243 The addition of airflow had a drastic effect on the bead size (Fig 3A). From the initial addition of  
244 airflow, the bead size decreased with a one-phase decay ( $R^2$  of 0.9925). The equation for the  
245 nonlinear fit is

$$246 \text{ Bead Diameter} = (1007.8) * e^{-0.005026 * \text{Air Pressure}} + 181.2,$$

247 where air pressure is in kPa. For the range where airflow was used, the decrease in bead size  
248 with increasing air pressure is approximately linear ( $R^2 = 0.8165$ ), described by the following  
249 equation:  $\text{Bead Diameter} = (-0.7653) * \text{Air Pressure} + 7.15.1$  .

250 Increasing nitrogen gas pressure was found to both decrease bead size and increase the index of  
251 dispersion (Fig 3A-B). While no airflow creates beads with the largest index of dispersion, the  
252 variance in bead diameters increased as air pressure is increased beyond 400 kPa (Fig 3B). A

253 rise in air pressure beyond 400 kPa also led to a reduction in bead circularity and greater  
254 deviation in circularity (Fig 3C). Representative images of these beads show drastic changes in  
255 bead diameters with the addition of air and loss of circularity at higher air pressures (Fig 3D).

256

257 **Fig 3. Characterization of air pressure effect on alginate microbeads.** Beads were  
258 generated using a 27G needle (0.21 mm diameter) with 2 % (w/v) alginate 10 cm from the  
259 calcium bath. The microbeads were generated with changing air pressure (A-C) with a constant  
260 pump speed (100  $\mu$ L/min). Generally, an increase in air pressure led to a decrease in the  
261 microbead diameters (A) and circularity (C). From the microbead diameter samples, the index  
262 of dispersion was calculated for bead diameters (B). In figure panel A, the mean is represented  
263 by the central line with the shaded areas denoting the error envelope of the standard deviation  
264 (n = 9). In figure panel B, points represent the index of dispersion of microbead diameters,  
265 calculated with the mean and standard deviation from the samples in panel A. In figure panel C,  
266 each data point represents the circularity of an individual microbead, that were also measured  
267 for their diameter (n = 9), with the mean of each condition represented by the central lines.  
268 Representative images of microbeads from air pressures 100-600 kPa are displayed with red  
269 outlined to highlight the resulting change in diameter and uniformity (D).

270

271 The addition of surfactant to the calcium bath was also determined to effect microbead  
272 properties. Alginate microbeads were created with various pump speeds using a 2% w/v alginate  
273 polymer solution and 400 kPa air pressure. The bead diameters were determined to linearly  
274 decrease with pump speed,  $R^2 = 0.8427$  (Fig 4A). The bead diameter increased by approximately  
275 40  $\mu$ m per 100  $\mu$ L/min change in pump speed in the range tested regardless of whether a  
276 surfactant was used or not. There is no significant difference in the index of dispersion of bead  
277 diameters with the addition of surfactant, nor for bead circularity (Fig 4B-C). Together, these

278 data demonstrate how bead diameter formation is dependent on factors that occur at the air-jet,  
279 while circularity of alginate microbeads is adjusted through factors relating to the calcium bath.

280

281 **Fig 4. Effect of pump speed and calcium bath surface tension on microbeads**  
282 **formed via the 3D printed air-jet.** The diameter of microbeads increased with quicker  
283 pump speed, at a constant air pressure, regardless of whether the calcium bath included a  
284 surfactant (0.01% (v/v) Tween 20)) (A). Furthermore, microbead uniformity was slightly  
285 improved through the addition of the surfactant, as indicated by the consistently lower index of  
286 dispersion and circularity. In figure panel A, the mean is represented by the central line with the  
287 shaded areas denoting the error envelope of the standard deviation (n = 6). In figure panel B,  
288 points represent the index of dispersion of microbead diameters, calculated with the mean and  
289 standard deviation from the samples in panel A. In figure panel C, each data point represents  
290 the circularity of an individual microbead, that were also measured for their diameter (n = 6),  
291 with the mean of each condition represented by the central lines.

292

## 293 **Validation of Open-Source Air-jet System Utility for** 294 **Encapsulation Strategies**

295 Alginate microbeads generated from the air-jet was interrogated for potential biomedical  
296 applications. Bacteria were successfully encapsulated in alginate microbeads of varying  
297 diameters by changing the air pressure (Fig 5A). Furthermore, these bacteria were viable and  
298 could proliferate within the alginate microbeads (Fig 5B). The air-jet could also generate  
299 degradable alginate microbeads. Alginate microbeads containing various alginate lyase  
300 concentrations were found to initially have similar distributions of bead diameters (Fig 5C). The

301 alginate microbeads containing alginate lyase decrease in size over 21 days, with the largest  
302 change within the first few days (Fig 5D). An approximate 27.3% reduction in microbead  
303 diameter was observed with 50 mU/mL of the enzyme.

304

305 **Fig 5. Encapsulation of bacteria and alginate degrading enzyme.** GFP expressing *E.*  
306 *coli* were encapsulated in alginate microbeads through applying the air-jet with varying air  
307 pressures, 600kPa (A) and 800 kPa (B), and imaged for the change in fluorescence between 24  
308 hours. In both cases, the enhanced distribution of the bacteria is observed over this timespan. In  
309 addition, varying concentrations of alginate lyase were encapsulated in alginate microbeads  
310 utilizing the air-jet system. The diameters of 50 microbeads per alginate lyase concentration  
311 suggest no initial difference in microbead size due to the encapsulation of the enzyme (C).  
312 Enzymatic degradation leads to a reduction in microbead diameters (D). In figure panel D, the  
313 mean is represented by the central line, with the shaded areas denoting the error envelope of the  
314 standard deviation (n = 50).

315

## 316 **Discussion**

317 The designed open-source air-jet reliably generated microbeads without the need for  
318 complex assembly or expensive lab equipment. To our knowledge, this is the first fully 3D  
319 printable air-jet system. Importantly, this device controls needle placement and airflow, making  
320 set-up easy and reproducible compared to other air-jet systems [18, 36]. Furthermore, the  
321 geometries of internal features take advantage of FDM 3D printers to generate the air-jet as one  
322 piece benefiting the accessibility and affordability of the design. Overall, the described air-jet  
323 system offers control over microbeads with defined set-up parameters that can be created with  
324 budget 3D printers.

325           The open-source air-jet described here provides an advantage in ensure reproducibility  
326 and reliability by allowing defined set-up parameters. Specifically, the separation from the  
327 needle and the airflow, comparable to other air-jets that shear droplets off the needle tip;  
328 however, the fixed needle position ensures central alignment with the airflow [20, 33, 37].  
329 Consequently, the described air-jet requires consideration of needle size is important to prevent  
330 the backflow of solution or air. In contrast, electrostatic bead generators do not need to consider  
331 needle size or backflow of components, but the air-jet is still advantageous for not requiring an  
332 electrical power source [18, 38]. To further prevent possible backflow or entrapment of solution,  
333 smaller diameter holes at the needle inlet were designed. Additionally, the air was flowing  
334 through the device before running the syringe pump with the needle placed approximately 0.5  
335 mm from the outlet. Together, these considerations result in monodispersed alginate  
336 microbeads in minutes, even with highly viscous solutions, for what would take hours with  
337 microfluidics [28, 39].

338           The fit definitive screening test determined polymer concentration, air pressure, needle  
339 diameter, and buffer type as factors influencing microbead formation. Advantageously, the DOE  
340 methodology dramatically reduced the total number of groups, from 162 to 18, where a group  
341 represents a specific combination of different factor values that could manipulate microbead  
342 properties. The results suggest that a higher alginate concentration, larger needle diameter, or  
343 lower air pressure leads to larger circular beads, an outcome consistent with alginate  
344 microbeads formed via other air-bifurcation or air-jet systems [17, 18, 37, 39]. Whereas lower  
345 concentrations of alginate and higher airflow speeds could generate smaller beads, the  
346 prediction trends suggest this could lead to problematic increase variance and decrease  
347 circularity. Although the circularity was improved with higher alginate concentrations, higher  
348 polymer densities can be disadvantageous for cell applications where cells are required to  
349 migrate through the hydrogel scaffold [37, 39]. Therefore, alternative methods, such as air  
350 pressure and needle size, should be utilized with the optimal polymer concentrations to achieve

351 circular hydrogel microbeads of the desired diameter. Taken together, alginate microbead  
352 properties can be controlled by adjusting multiple parameters involved with this air-jet design.

353 Pump speed and air pressure were interrogated as methods to regulate microbead size,  
354 circularity, and uniformity. While air pressure could control the size of beads from 2 mm to 200  
355  $\mu\text{m}$ , adjusting pump speed changed bead sizes from 350 to 425  $\mu\text{m}$ , suggesting air pressure  
356 provides a more dynamic range of bead sizes. However, both methods generate beads in the  
357 range of 200-800 microns in diameter with a coefficient of variation of less than 10% that is  
358 often desired for encapsulation of cell applications [40]. Although microbeads smaller than 200  
359 microns can be made with higher air pressures, tear-shaped droplets will form without sufficient  
360 distance and time for the droplet to become round [41]. Additionally, the surface tension of the  
361 bath also contributes to deviations in circularity. Consistent with previous reports, the addition  
362 of a surfactant to the calcium bath did improve the circularity of beads in this system [39].

363 Overall, the designed open-source system generates microbeads with desirable characteristics,  
364 with similar considerations as other air-jet systems being required to improve bead uniformity.

365 The encapsulation of bacteria and the enzyme alginate lyase highlight the distinct  
366 benefits of the described air-jet system for encapsulating cargo that can degrade the hydrogel  
367 matrix. Here, we load microbeads with bacteria, and their growth over 24 hours results in  
368 pockets of bacteria within the hydrogel matrix. The encapsulation of bacteria is promising for  
369 numerous biomedical applications, including probiotic delivery, especially for anaerobic  
370 bacteria sensitive to atmospheric oxygen concentrations [21, 42-45]. By using the air-jet system  
371 with nitrogen gas in a nitrogen-enriched chamber, microbeads could be rapidly generated with  
372 anaerobic bacteria while displacing oxygen [21]. Furthermore, the use of enzymes to degrade  
373 alginate has been previously used to control the delivery of endothelial progenitor cells and  
374 adeno-associated vectors [46, 47]. The rapid degradation of microbeads observed here suggests  
375 heterogenous microbeads could result from a slower output rate, such as with microfluidic



376 methods [28]. Herein, we demonstrate the specialized utility of this open-source air-jet system  
377 that can rapidly generate monodispersed microbeads for encapsulation applications.

378 In conclusion, we present an open-source air-jet with simple features that can be printed  
379 on a small budget 3D printer. The system's modular design allows easy cleaning,  
380 interchangeability to customized set-ups, and rapid replacement. We have demonstrated that  
381 alginate microbeads can be generated using this open-source air jet system with reasonable  
382 microbead diameters and variance. We anticipate the system will enable other research  
383 laboratories, as well as other fields, to easily generate polymeric microbeads.

## 384 **References**

- 385 1. Hofseth LJ. Getting rigorous with scientific rigor. *Carcinogenesis*. 2018;39(1):21-5. Epub  
386 2017/10/03. doi: 10.1093/carcin/bgx085. PubMed PMID: 28968787; PubMed Central PMCID:  
387 PMC5862244.
- 388 2. Collins FS, Tabak LA. Policy: NIH plans to enhance reproducibility. *Nature*.  
389 2014;505(7485):612-3. Epub 2014/02/01. doi: 10.1038/505612a. PubMed PMID: 24482835;  
390 PubMed Central PMCID: PMC4058759.
- 391 3. Brembs B. Prestigious Science Journals Struggle to Reach Even Average Reliability.  
392 *Frontiers in human neuroscience*. 2018;12:37. Epub 2018/03/09. doi:  
393 10.3389/fnhum.2018.00037. PubMed PMID: 29515380; PubMed Central PMCID:  
394 PMC5826185.
- 395 4. Goodman SN, Fanelli D, Ioannidis JP. What does research reproducibility mean?  
396 *Science translational medicine*. 2016;8(341):341ps12. Epub 2016/06/03. doi:  
397 10.1126/scitranslmed.aaf5027. PubMed PMID: 27252173.
- 398 5. Leek JT, Peng RD. Opinion: Reproducible research can still be wrong: adopting a  
399 prevention approach. *Proceedings of the National Academy of Sciences of the United States of*

- 400 America. 2015;112(6):1645-6. Epub 2015/02/12. doi: 10.1073/pnas.1421412111. PubMed  
401 PMID: 25670866; PubMed Central PMCID: PMC4330755.
- 402 6. Anderson WP. Reproducibility: Stamp out shabby research conduct. *Nature*.  
403 2015;519(7542):158. Epub 2015/03/13. doi: 10.1038/519158a. PubMed PMID: 25762270.
- 404 7. Nowogrodzki A. How to support open-source software and stay sane. *Nature*.  
405 2019;571(7763):133-4. Epub 2019/07/03. doi: 10.1038/d41586-019-02046-0. PubMed PMID:  
406 31263262.
- 407 8. Maia Chagas A. Haves and have nots must find a better way: The case for open  
408 scientific hardware. *PLoS biology*. 2018;16(9):e3000014-e. doi: 10.1371/journal.pbio.3000014.  
409 PubMed PMID: 30260950.
- 410 9. Health Nlo. NIH 3D Print Exchange 2018 [cited 2018]. Available from:  
411 <https://3dprint.nih.gov/>.
- 412 10. Baden T, Chagas AM, Gage G, Marzullo T, Prieto-Godino LL, Euler T. Open Labware:  
413 3-D Printing Your Own Lab Equipment. *PLOS Biology*. 2015;13(3):e1002086. doi:  
414 10.1371/journal.pbio.1002086.
- 415 11. Marzullo TC, Gage GJ. The SpikerBox: A Low Cost, Open-Source BioAmplifier for  
416 Increasing Public Participation in Neuroscience Inquiry. *PloS one*. 2012;7(3):e30837. doi:  
417 10.1371/journal.pone.0030837.
- 418 12. Pearce JM. Building Research Equipment with Free, Open-Source Hardware. *Science*.  
419 2012;337(6100):1303.
- 420 13. Sulkin MS, Widder E, Shao C, Holzem KM, Gloschat C, Gutbrod SR, et al. Three-  
421 dimensional printing physiology laboratory technology. *American Journal of Physiology-Heart  
422 and Circulatory Physiology*. 2013;305(11):H1569-H73. doi: 10.1152/ajpheart.00599.2013.
- 423 14. Cybulski JS, Clements J, Prakash M. Foldscope: Origami-Based Paper Microscope.  
424 *PloS one*. 2014;9(6):e98781. doi: 10.1371/journal.pone.0098781.

- 425 15. Zhang C, Anzalone NC, Faria RP, Pearce JM. Open-Source 3D-Printable Optics  
426 Equipment. *PloS one*. 2013;8(3):e59840. doi: 10.1371/journal.pone.0059840. PubMed PMID:  
427 PMC3609802.
- 428 16. Pryor S. Implementing a 3D Printing Service in an Academic Library. *Journal of Library*  
429 *Administration*. 2014;54(1):1-10. doi: 10.1080/01930826.2014.893110.
- 430 17. Ahn S, Kim G. Cell-encapsulating alginate micro-sized beads using an air-assisted  
431 atomization process to obtain a cell-laden hybrid scaffold. *Journal of Materials Chemistry B*.  
432 2015;3(47):9132-9. doi: 10.1039/C5TB01629K.
- 433 18. Chan JM, Zervantonakis IK, Rimchala T, Polacheck WJ, Whisler J, Kamm RD.  
434 Engineering of In Vitro 3D Capillary Beds by Self-Directed Angiogenic Sprouting. *PloS one*.  
435 2012;7(12):e50582. doi: 10.1371/journal.pone.0050582.
- 436 19. Jitraruch S, Dhawan A, Hughes RD, Filippi C, Soong D, Philippeos C, et al. Alginate  
437 Microencapsulated Hepatocytes Optimised for Transplantation in Acute Liver Failure. *PloS one*.  
438 2014;9(12):e113609. doi: 10.1371/journal.pone.0113609.
- 439 20. Serra M, Correia C, Malpique R, Brito C, Jensen J, Bjorquist P, et al. Microencapsulation  
440 Technology: A Powerful Tool for Integrating Expansion and Cryopreservation of Human  
441 Embryonic Stem Cells. *PloS one*. 2011;6(8):e23212. doi: 10.1371/journal.pone.0023212.
- 442 21. Kailasapathy K. Microencapsulation of probiotic bacteria: technology and potential  
443 applications. *Current issues in intestinal microbiology*. 2002;3(2):39-48. Epub 2002/10/29.  
444 PubMed PMID: 12400637.
- 445 22. Khanna O, Larson JC, Moya ML, Opara EC, Brey EM. Generation of alginate  
446 microspheres for biomedical applications. *Journal of visualized experiments : JoVE*.  
447 2012;(66):3388. doi: 10.3791/3388. PubMed PMID: 22907205.
- 448 23. Lee KY, Mooney DJ. Alginate: properties and biomedical applications. *Progress in*  
449 *polymer science*. 2012;37(1):106-26. doi: 10.1016/j.progpolymsci.2011.06.003. PubMed PMID:  
450 PMC3223967.

- 451 24. Smidsrod O, Skjak-Braek G. Alginate as immobilization matrix for cells. Trends  
452 Biotechnol. 1990;8(3):71-8. Epub 1990/03/01. PubMed PMID: 1366500.
- 453 25. Remminghorst U, Rehm BH. Bacterial alginates: from biosynthesis to applications.  
454 Biotechnology letters. 2006;28(21):1701-12. Epub 2006/08/17. doi: 10.1007/s10529-006-9156-  
455 x. PubMed PMID: 16912921.
- 456 26. Tonnesen HH, Karlsen J. Alginate in drug delivery systems. Drug development and  
457 industrial pharmacy. 2002;28(6):621-30. Epub 2002/08/02. doi: 10.1081/ddc-120003853.  
458 PubMed PMID: 12149954.
- 459 27. Torres AL, Bidarra SJ, Pinto MT, Aguiar PC, Silva EA, Barrias CC. Guiding  
460 morphogenesis in cell-instructive microgels for therapeutic angiogenesis. Biomaterials.  
461 2018;154:34-47. doi: <https://doi.org/10.1016/j.biomaterials.2017.10.051>.
- 462 28. Madrigal JL, Stilhano RS, Siltanen C, Tanaka K, Rezvani SN, Morgan RP, et al.  
463 Microfluidic generation of alginate microgels for the controlled delivery of lentivectors. Journal of  
464 Materials Chemistry B. 2016;4(43):6989-99. doi: 10.1039/C6TB02150F.
- 465 29. Leslie SK, Cohen DJ, Sedlacek J, Pinsker EJ, Boyan BD, Schwartz Z. Controlled  
466 release of rat adipose-derived stem cells from alginate microbeads. Biomaterials.  
467 2013;34(33):8172-84. doi: <https://doi.org/10.1016/j.biomaterials.2013.07.017>.
- 468 30. Gryshkov O, Pogozykh D, Hofmann N, Pogozykh O, Mueller T, Glasmacher B.  
469 Encapsulating Non-Human Primate Multipotent Stromal Cells in Alginate via High Voltage for  
470 Cell-Based Therapies and Cryopreservation. PloS one. 2014;9(9):e107911. doi:  
471 10.1371/journal.pone.0107911.
- 472 31. Moya ML, Morley M, Khanna O, Opara EC, Brey EM. Stability of alginate microbead  
473 properties in vitro. Journal of materials science Materials in medicine. 2012;23(4):903-12. Epub  
474 2012/02/16. doi: 10.1007/s10856-012-4575-9. PubMed PMID: 22350778.
- 475 32. Wolters GH, Fritschy WM, Gerrits D, van Schilfgaarde R. A versatile alginate droplet  
476 generator applicable for microencapsulation of pancreatic islets. Journal of applied biomaterials

- 477 : an official journal of the Society for Biomaterials. 1991;3(4):281-6. Epub 1991/01/01. doi:  
478 10.1002/jab.770030407. PubMed PMID: 10147997.
- 479 33. Kendall WF, Darrabie MD, El-Shewy HM, Opara EC. Effect of alginate composition and  
480 purity on alginate microspheres. *Journal of Microencapsulation*. 2004;21(8):821-8. doi:  
481 10.1080/02652040400015452.
- 482 34. Campbell KT, Hadley DJ, Kukis DL, Silva EA. Alginate hydrogels allow for bioactive and  
483 sustained release of VEGF-C and VEGF-D for lymphangiogenic therapeutic applications. *PloS*  
484 *one*. 2017;12(7):e0181484. Epub 2017/07/21. doi: 10.1371/journal.pone.0181484. PubMed  
485 PMID: 28723974; PubMed Central PMCID: PMC5517064.
- 486 35. Wong TY, Preston LA, Schiller NL. ALGINATE LYASE: review of major sources and  
487 enzyme characteristics, structure-function analysis, biological roles, and applications. *Annual*  
488 *review of microbiology*. 2000;54:289-340. Epub 2000/10/06. doi:  
489 10.1146/annurev.micro.54.1.289. PubMed PMID: 11018131.
- 490 36. Andrejcsk JW, Cui J, Chang WG, Devalliere J, Pober JS, Saltzman WM. Paracrine  
491 exchanges of molecular signals between alginate-encapsulated pericytes and freely suspended  
492 endothelial cells within a 3D protein gel. *Biomaterials*. 2013;34(35):8899-908. doi:  
493 <https://doi.org/10.1016/j.biomaterials.2013.08.008>.
- 494 37. Zimmermann H, Shirley SG, Zimmermann U. Alginate-based encapsulation of cells:  
495 Past, present, and future. *Current Diabetes Reports*. 2007;7(4):314-20. doi: 10.1007/s11892-  
496 007-0051-1.
- 497 38. Man Y, Wang P, Guo Y, Xiang L, Yang Y, Qu Y, et al. Angiogenic and osteogenic  
498 potential of platelet-rich plasma and adipose-derived stem cell laden alginate microspheres.  
499 *Biomaterials*. 2012;33(34):8802-11. doi: <https://doi.org/10.1016/j.biomaterials.2012.08.054>.
- 500 39. Koch S, Schwinger C, Kressler J, Heinzen C, Rainov NG. Alginate encapsulation of  
501 genetically engineered mammalian cells: comparison of production devices, methods and

- 502 microcapsule characteristics. *J Microencapsul.* 2003;20(3):303-16. Epub 2003/07/26. doi:  
503 10.1080/0265204021000058438. PubMed PMID: 12881112.
- 504 40. Lee BB, Ravindra P, Chan ES. Size and Shape of Calcium Alginate Beads Produced by  
505 Extrusion Dripping. *Chemical Engineering & Technology.* 2013;36(10):1627-42. doi:  
506 10.1002/ceat.201300230.
- 507 41. Davarcı F, Turan D, Ozcelik B, Poncelet D. The influence of solution viscosities and  
508 surface tension on calcium-alginate microbead formation using dripping technique. *Food*  
509 *Hydrocolloids.* 2017;62:119-27. doi: <https://doi.org/10.1016/j.foodhyd.2016.06.029>.
- 510 42. Sohail A, Turner MS, Coombes A, Bostrom T, Bhandari B. Survivability of probiotics  
511 encapsulated in alginate gel microbeads using a novel impinging aerosols method. *International*  
512 *Journal of Food Microbiology.* 2011;145(1):162-8. doi:  
513 <https://doi.org/10.1016/j.ijfoodmicro.2010.12.007>.
- 514 43. Yeung TW, Üçok EF, Tiani KA, McClements DJ, Sela DA. Microencapsulation in  
515 Alginate and Chitosan Microgels to Enhance Viability of *Bifidobacterium longum* for Oral  
516 Delivery. *Frontiers in microbiology.* 2016;7:494-. doi: 10.3389/fmicb.2016.00494. PubMed  
517 PMID: 27148184.
- 518 44. Sultana K, Godward G, Reynolds N, Arumugaswamy R, Peiris P, Kailasapathy K.  
519 Encapsulation of probiotic bacteria with alginate–starch and evaluation of survival in simulated  
520 gastrointestinal conditions and in yoghurt. *International Journal of Food Microbiology.*  
521 2000;62(1):47-55. doi: [https://doi.org/10.1016/S0168-1605\(00\)00380-9](https://doi.org/10.1016/S0168-1605(00)00380-9).
- 522 45. Shimamura S, Abe F, Ishibashi N, Miyakawa H, Yaeshima T, Araya T, et al. Relationship  
523 Between Oxygen Sensitivity and Oxygen Metabolism of *Bifidobacterium* Species. *Journal of*  
524 *Dairy Science.* 1992;75(12):3296-306. doi: [https://doi.org/10.3168/jds.S0022-0302\(92\)78105-3](https://doi.org/10.3168/jds.S0022-0302(92)78105-3).
- 525 46. Campbell KT, Stilhano RS, Silva EA. Enzymatically degradable alginate hydrogel  
526 systems to deliver endothelial progenitor cells for potential revasculature applications.

527 Biomaterials. 2018;179:109-21. doi: 10.1016/j.biomaterials.2018.06.038. PubMed PMID:  
528 29980073.  
529 47. Madrigal JL, Shams S, Stilhano RS, Silva EA. Characterizing the encapsulation and  
530 release of lentivectors and adeno-associated vectors from degradable alginate hydrogels.  
531 Biomaterials Science. 2019;7(2):645-56. doi: 10.1039/C8BM01218K.  
532

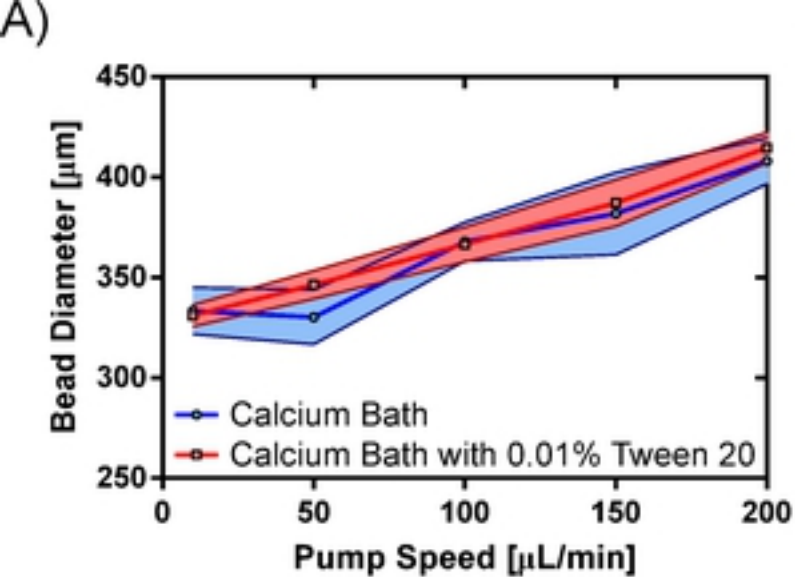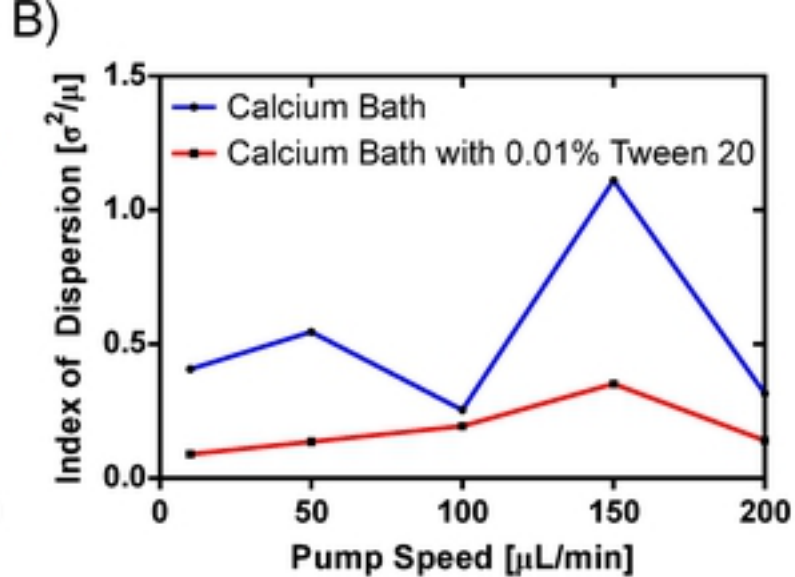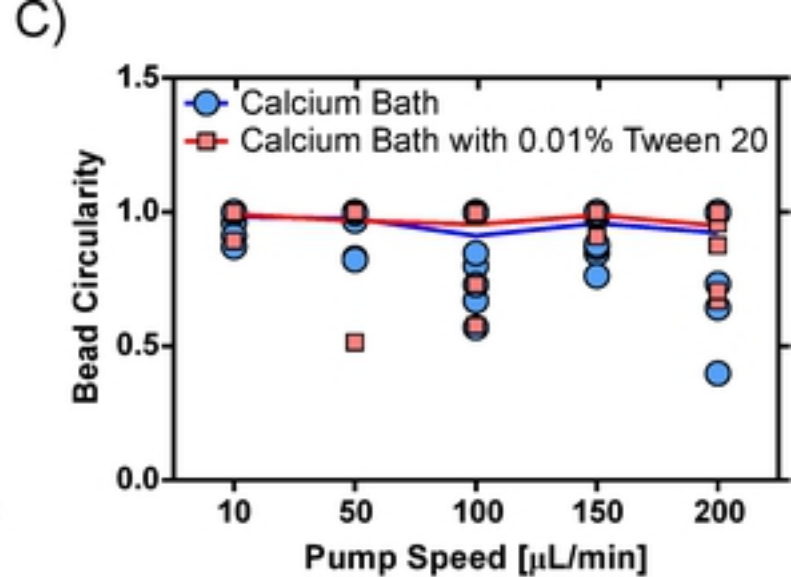

Figure 4



A)

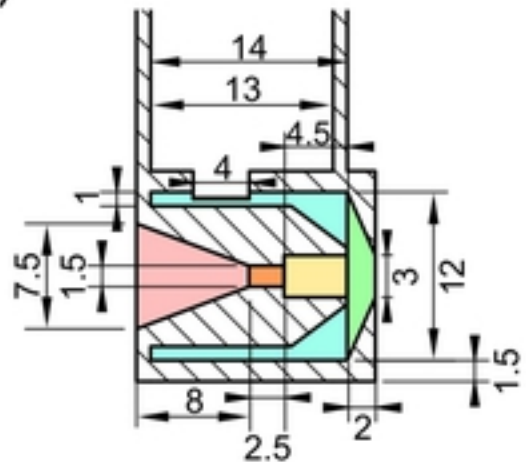

B)

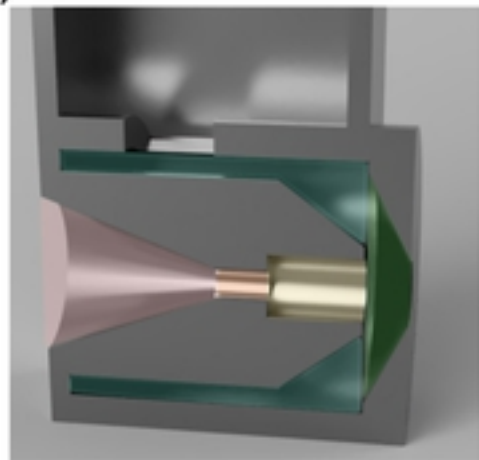

C)

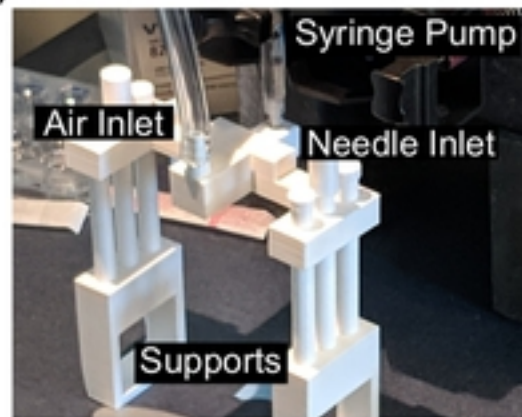

D)

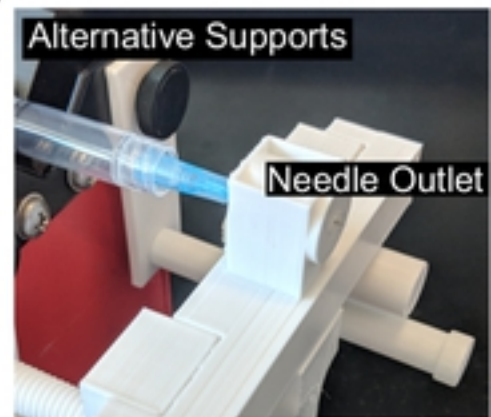

Figure 1

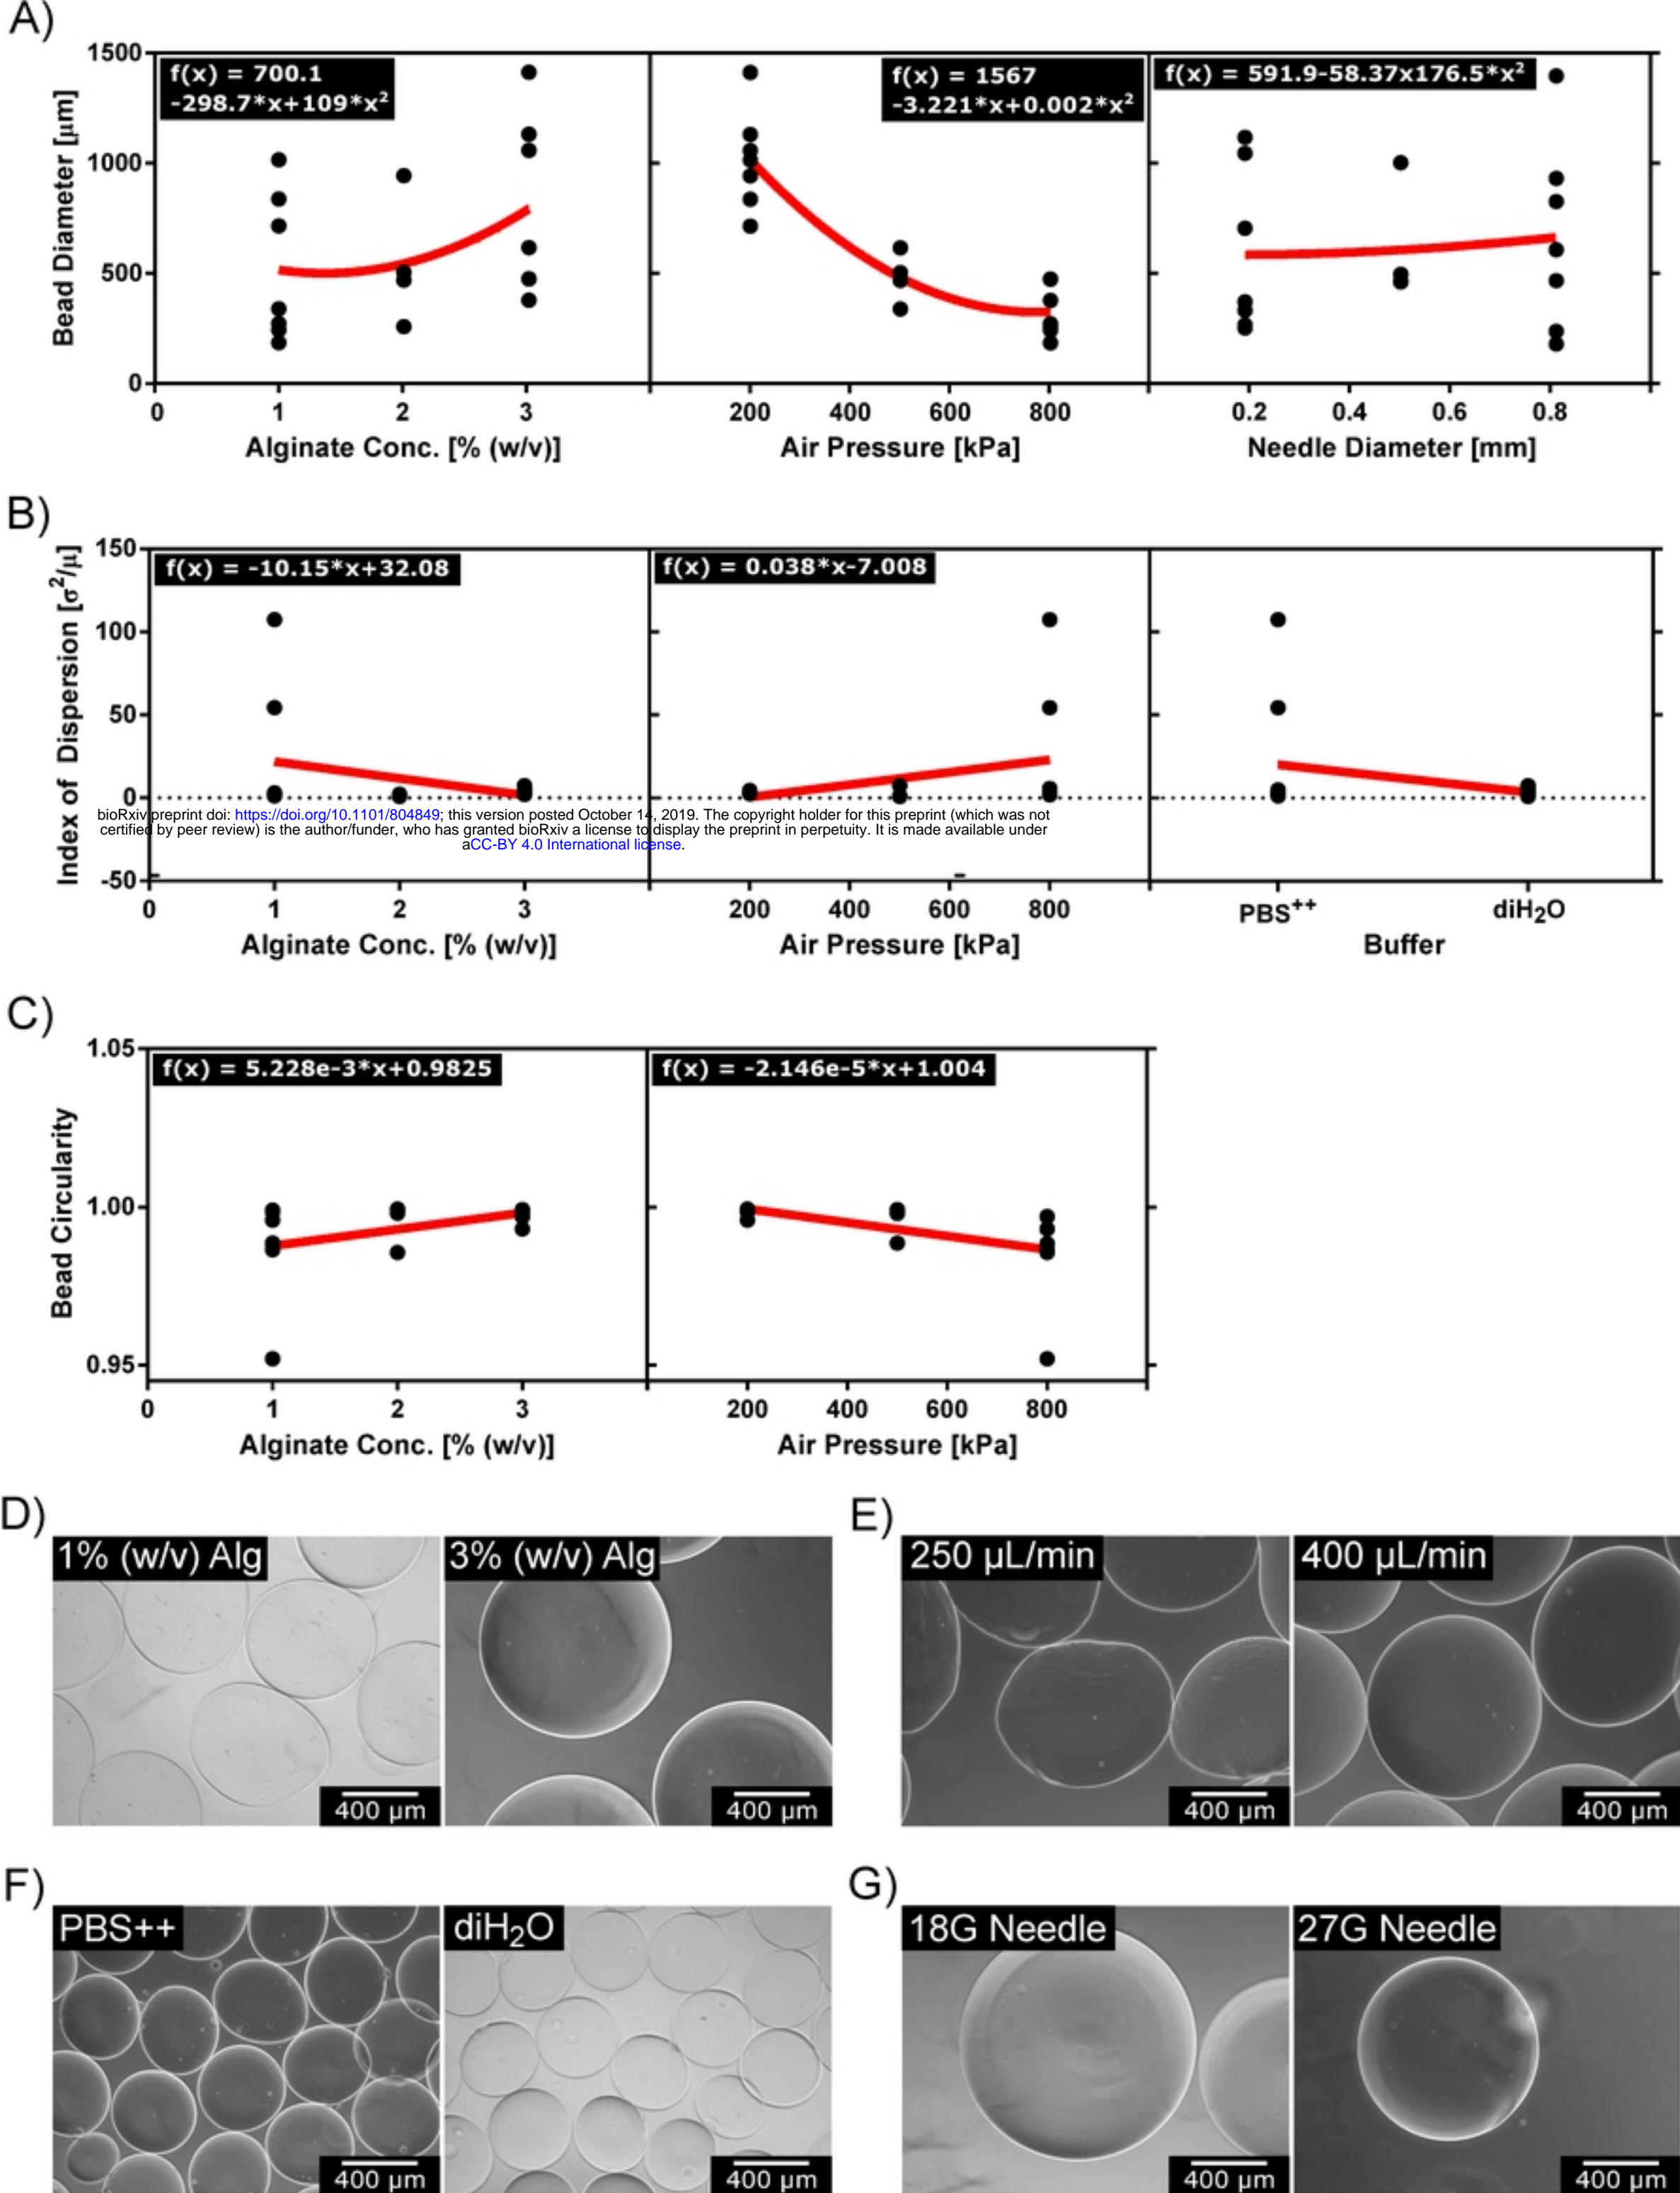

Figure 2

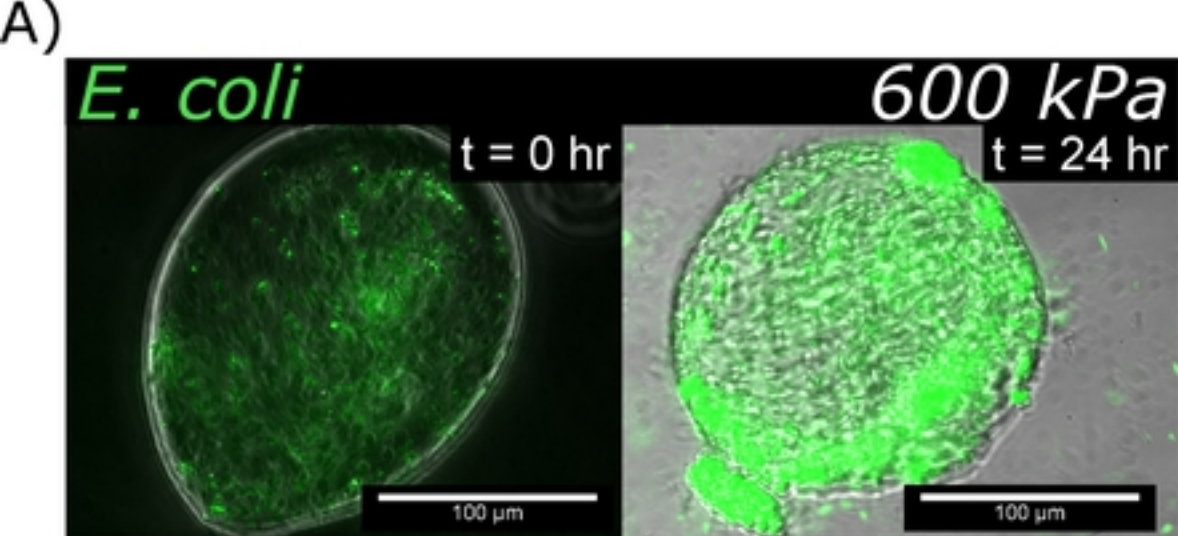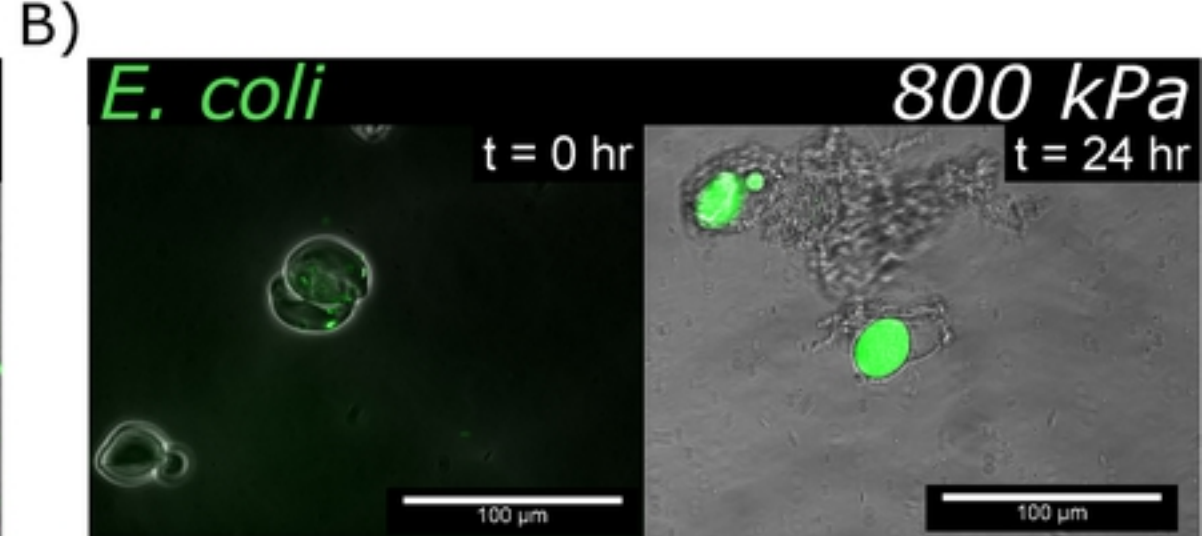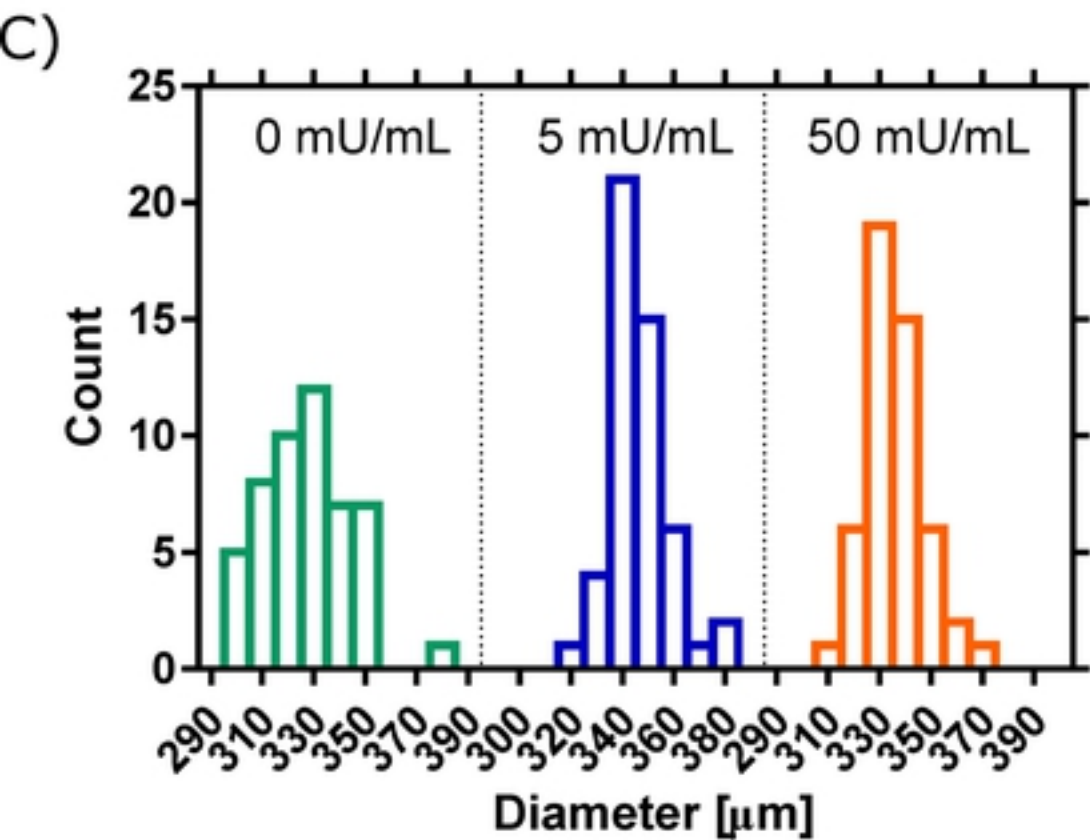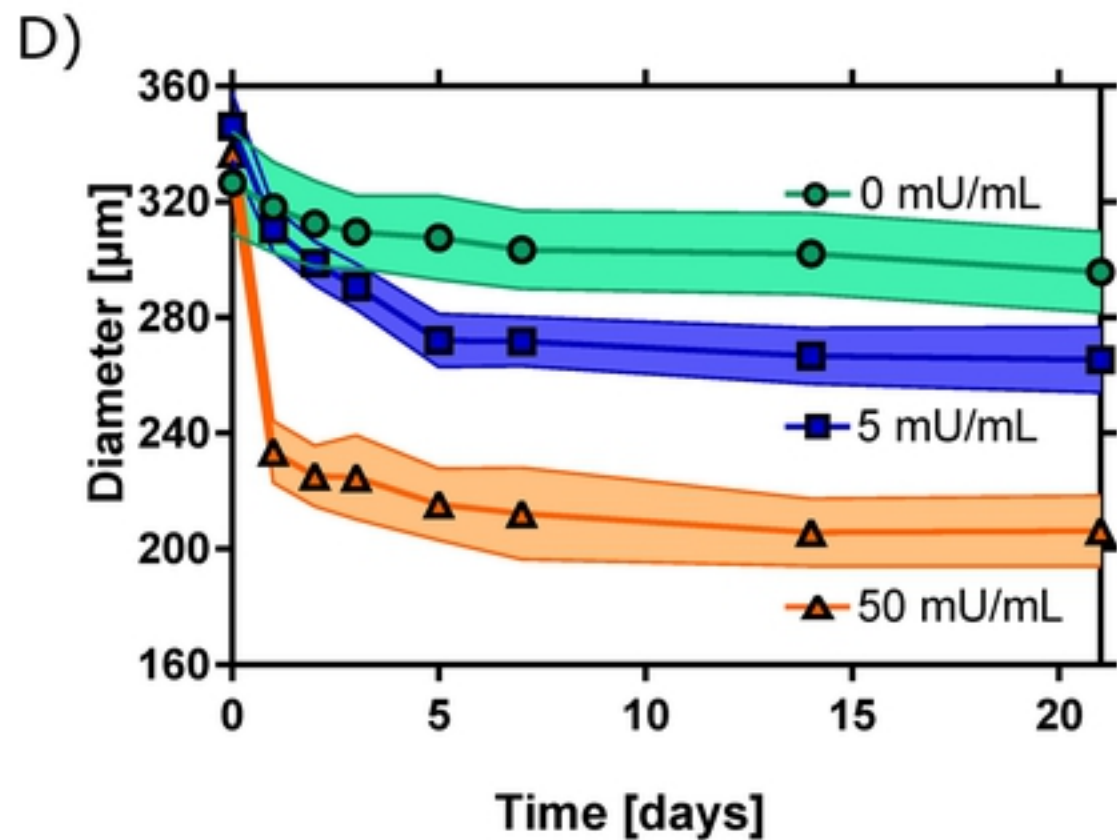

Figure 5

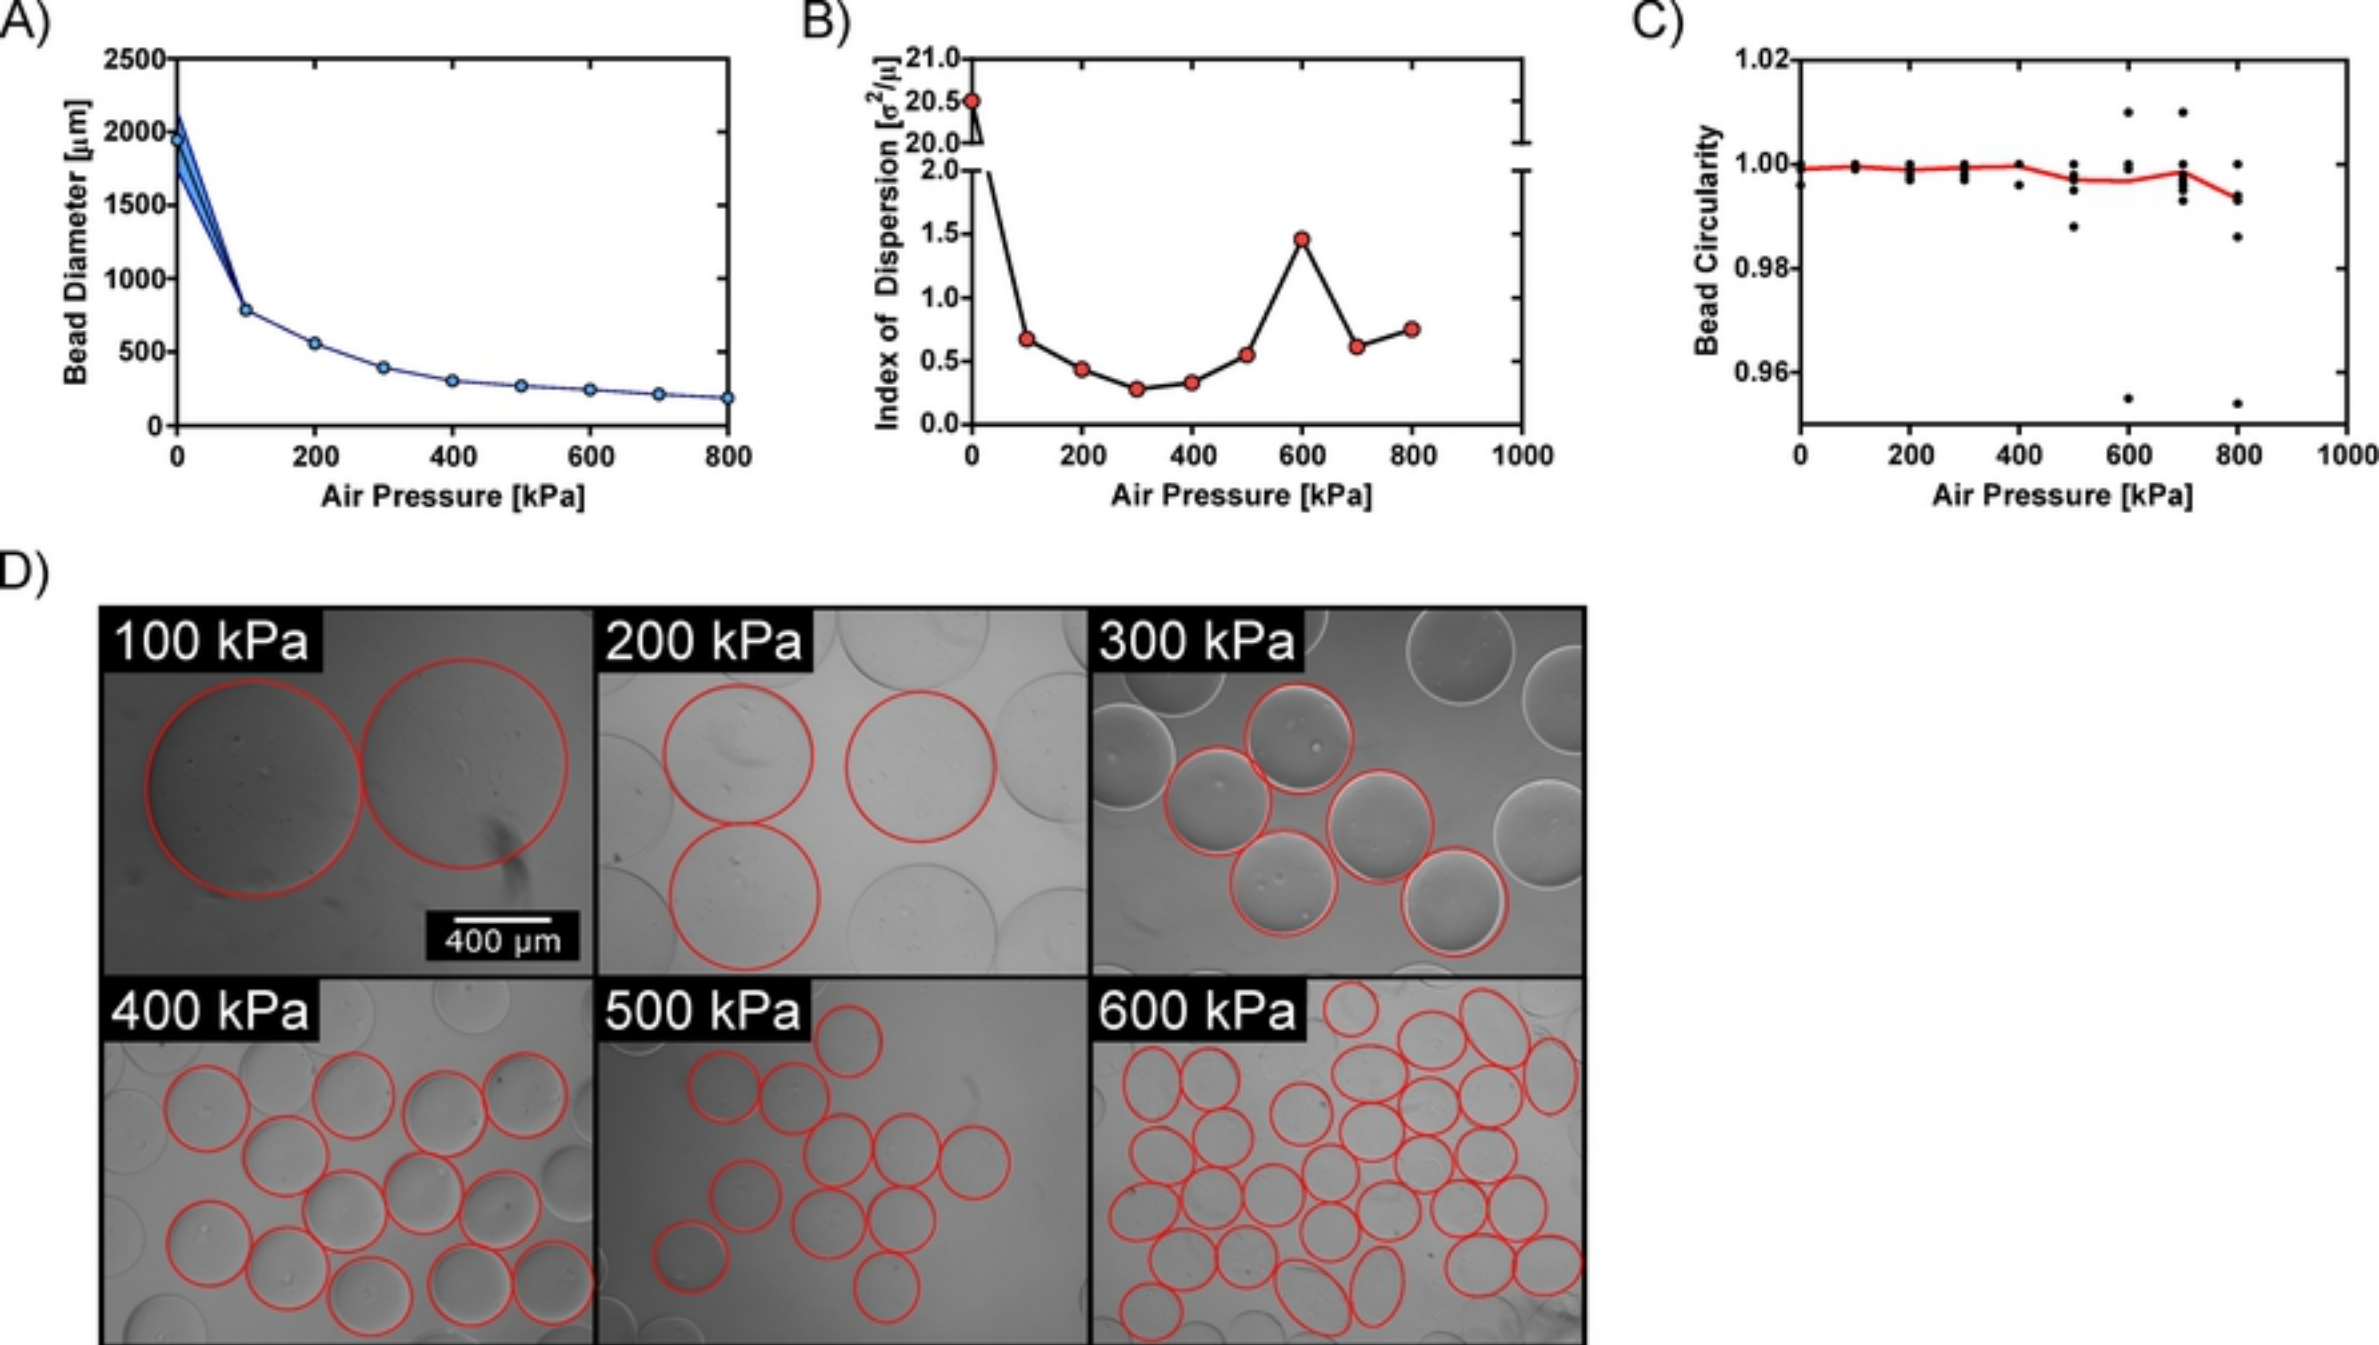

Figure 3
